# Supplementary material for: The Use of PGPB to Promote Plant Hydroponic Growth
Source: MDPI journal article supplement (doi:10.3390/plants11202783), 2022-10-20
Supplement: s1 [file s1]

**Supplemental Table S1: Plant growth promoting bacteria studied in hydroponic systems**

| Crop                                | PGPB                                                                                                                                                        | Increase in yield obtained (%)     | Number of plants tested                                               | Day harvested                             | Hydroponic system used                                               | Mechanism of action and main conclusion                                                                                                                                                                                                                 | Reference           |
|-------------------------------------|-------------------------------------------------------------------------------------------------------------------------------------------------------------|------------------------------------|-----------------------------------------------------------------------|-------------------------------------------|----------------------------------------------------------------------|---------------------------------------------------------------------------------------------------------------------------------------------------------------------------------------------------------------------------------------------------------|---------------------|
| Banana<br>Barangan<br>dessert       | <ul style="list-style-type: none"> <li>• <i>Azospirillum</i></li> <li>• <i>Bacillus sphaericus</i></li> </ul>                                               | 137-141%<br>(nitrogen free system) | Randomized design<br>6 replicates<br>3 treatments                     | 45 days post transplant<br>10-11cm height | Nitrogen free system<br>4L pot                                       | <ul style="list-style-type: none"> <li>• Nitrogen fixation from bacteria in a nitrogen free system</li> <li>• Increased nitrogen uptake led to increased photosynthesis</li> </ul>                                                                      | Mia, 2010 [102]     |
| Banana<br>BRS Princesa<br>Prata Anã | <ul style="list-style-type: none"> <li>• <i>Bacillus cereus</i></li> <li>• <i>Bacillus thuringiensis</i></li> <li>• <i>Buttiauxella agrestis</i></li> </ul> | 10.8 (BRS) - 31.7% (PA)            | Randomized design<br>5 replicates, 3 plants<br>4 inoculants + control | 90 days post transplant                   | 5 floating systems<br>500 L reservoir<br>Daily nutrient replenishing | <ul style="list-style-type: none"> <li>• Seedling acclimatization period was reduced from 90 to either 25 (PA) or 15 (BRS) days</li> <li>• Auxin production</li> <li>• Increased photosynthetic rate</li> </ul>                                         | Araújo, 2022 [124]  |
| Canola<br>Sarigol                   | <ul style="list-style-type: none"> <li>• <i>Pseudomonas fluorescens</i></li> </ul>                                                                          | ~10%                               | Split plots design<br>3 replicates                                    | "Latest stage of morphological growth"    | Unspecified system with 10-20L tanks                                 | <ul style="list-style-type: none"> <li>• Inoculated plants performed better under both regular and osmotically stressed (PEG 6000 - 50-70% FC) conditions</li> <li>• Higher metabolic/energy related protein expression in inoculated plants</li> </ul> | Gharelo, 2016 [145] |

|               |                                                                                                                                                                                                      |                                                 |                                                                                                                          |          |                                        |                                                                                                                                                                                                           |                   |
|---------------|------------------------------------------------------------------------------------------------------------------------------------------------------------------------------------------------------|-------------------------------------------------|--------------------------------------------------------------------------------------------------------------------------|----------|----------------------------------------|-----------------------------------------------------------------------------------------------------------------------------------------------------------------------------------------------------------|-------------------|
| Canola        | <ul style="list-style-type: none"> <li>• <i>Arthrobacter</i> sp.</li> <li>• <i>Bacillus altitudinis</i></li> </ul>                                                                                   | 10-20%                                          | 4 inoculants + control                                                                                                   | 3 months | Unknown                                | <ul style="list-style-type: none"> <li>• ACC deaminase, IAA, phosphorus solubilization, siderophores</li> </ul>                                                                                           | Pan, 2017 [115]   |
| Xikouhuazi    | <ul style="list-style-type: none"> <li>• <i>Bacillus megaterium</i></li> <li>• <i>Sphingomonas</i></li> </ul>                                                                                        |                                                 | 6 replicates                                                                                                             |          |                                        |                                                                                                                                                                                                           |                   |
| Choy sum      | <ul style="list-style-type: none"> <li>• <i>Azotobacter</i></li> </ul>                                                                                                                               | Percent yield increase not stated               | Randomized factorial design<br><br>5 levels of PBPR concentration , 6 levels of IAA solution<br><br>5 pots per treatment | 45 days  | Sterilized pots containing vermiculite | <ul style="list-style-type: none"> <li>• 5 g of immobilized <i>Azotobacter</i> sp. bead per plant and 1 ml/plant/week of 40-60 <math>\mu</math>M IAA solution was optimal for growth increases</li> </ul> | Ma-on, 2009 [103] |
| Chrysanthemum | <ul style="list-style-type: none"> <li>• <i>Pseudomonas chlororaphis</i></li> <li>• <i>Pseudomonas corrugata</i></li> </ul>                                                                          | <i>Pythium</i> root colonization reduced 72-91% | Randomized complete block                                                                                                | 18 days  | 500mL or 1.9L individual units         | <ul style="list-style-type: none"> <li>• <i>Pseudomonas chlororaphis</i> and <i>Bacillus cereus</i> were the best at <i>Pythium</i> biocontrol</li> </ul>                                                 | Liu, 2007 [130]   |
| Fina          | <ul style="list-style-type: none"> <li>• <i>Pseudomonas fluorescens</i></li> <li>• <i>Bacillus cereus</i></li> <li>• <i>Comamonas acidovorans</i></li> <li>• <i>Burkholderia gladioli</i></li> </ul> |                                                 | Untreated+ pathogen controls<br><br>13 inoculants<br><br>4 plants/ exp Repeated twice                                    |          | Aerated via continuous bubbling        |                                                                                                                                                                                                           |                   |

|          |                                                                                                                                                                                                                                                                                                                                           |                                                           |                                                                                 |               |                                                                                                 |                                                                                                                                                                                                                                                                                                                                                                |                                       |
|----------|-------------------------------------------------------------------------------------------------------------------------------------------------------------------------------------------------------------------------------------------------------------------------------------------------------------------------------------------|-----------------------------------------------------------|---------------------------------------------------------------------------------|---------------|-------------------------------------------------------------------------------------------------|----------------------------------------------------------------------------------------------------------------------------------------------------------------------------------------------------------------------------------------------------------------------------------------------------------------------------------------------------------------|---------------------------------------|
| Cucumber | <ul style="list-style-type: none"> <li>• <i>Pseudomonas putida</i></li> <li>• <i>Serratia marcescens</i></li> <li>• <i>Bacillus spp.</i></li> <li>• <i>Pseudomonas fluorescens</i></li> </ul> <p>Commercial product:</p> <ul style="list-style-type: none"> <li>• <i>Bacillus amyloliquefaciens</i></li> </ul>                            | 78.5-121.1%<br><br>Commercial product was 66.1% increase  | Randomized block<br><br>5 PGPR +control<br><br>9 plants/pot<br><br>4 replicates | 14 weeks      | Drip irrigation<br><br>2L/h flow rate<br><br>8L Perlite/plant<br><br>3.48 plants/m <sup>2</sup> | <ul style="list-style-type: none"> <li>• Highest yields were obtained from <i>Pseudomonas putida</i> and <i>Serratia marcescens</i></li> <li>• IAA production</li> <li>• <i>Fusarium</i> antagonism</li> <li>• Native PGPR strains resulted in higher yield increases than the <i>Bacillus</i> inoculant</li> </ul>                                            | Gül, 2013 [122]                       |
| Cucumber | <ul style="list-style-type: none"> <li>• <i>Pseudomonas chlororaphis</i></li> <li>• <i>Trichoderma harzianum</i> (RootShield Drench)</li> <li>• <i>Streptomyces griseoviridis</i> (Mycostop)</li> <li>• <i>Gliocladium catenulatum</i> (Prestop WP, Prestop Mix)</li> <li>• <i>Trichoderma (Gliocladium) virens</i> (SoilGard)</li> </ul> | Decreased mortality > 50%                                 | 5 inoculants, 3 media types, 2 fungicides                                       | Up to 40 days | 10 × 10 × 7 cm high rock wool blocks in individual plastic bag                                  | <ul style="list-style-type: none"> <li>• <i>G. catenulatum</i> and <i>Pseudomonas chlororaphis</i> reduced seedling mortality from <i>Fusarium</i> under varying experimental conditions</li> <li>• <i>G. catenulatum</i> and <i>Streptomyces</i> were more effective than <i>Trichoderma</i> at preventing <i>Pythium</i> root rot and damping off</li> </ul> | Rose, 2003 [137]<br>Punja, 2003 [136] |
| Cucumber | <ul style="list-style-type: none"> <li>• <i>Trichoderma harzianum</i></li> </ul>                                                                                                                                                                                                                                                          | ~42% increase in dry shoot weight<br><br>No data on fruit | 20 plants x 5 containers per treatment<br><br>PGPR+ control<br>Repeated twice   | 28 days       | Autoclavable transparent polycarbonate boxes<br><br>500mL, adjusted daily                       | <ul style="list-style-type: none"> <li>• Increased P, Fe, Cu, Mn, Zn after inoculation</li> </ul>                                                                                                                                                                                                                                                              | Yedidia, 2001 [116]                   |

|                                                 |                                                                                           |                                   |                                                                                                                           |            |                                                                                |                                                                                                                                                                       |                             |
|-------------------------------------------------|-------------------------------------------------------------------------------------------|-----------------------------------|---------------------------------------------------------------------------------------------------------------------------|------------|--------------------------------------------------------------------------------|-----------------------------------------------------------------------------------------------------------------------------------------------------------------------|-----------------------------|
| Duckweed                                        | <ul style="list-style-type: none"> <li><i>Acinetobacter calcoaceticus</i></li> </ul>      | 1.9-2.3x more                     | 20-30 fronds/100mL                                                                                                        | 7 days     | 1L and 100mL containers<br><br>Repeated batch experiments with re-colonization | <ul style="list-style-type: none"> <li>PGPB was involved with phosphorus and nitrogen cycling</li> </ul>                                                              | Ishizawa, 2020 [100]        |
| Duckweed                                        | <ul style="list-style-type: none"> <li><i>Aquitalea magnusonii</i></li> </ul>             | 11.7-32.1%<br><br>5/9 experiments | 10 fronds/60mL<br><br>10 <sup>4</sup> and 10 <sup>6</sup> inoculation doses<br><br>9 replicates for 12 different groups   | 7 days     | 60mL Erlenmeyer flasks                                                         | <ul style="list-style-type: none"> <li><i>Aquitalea magnusonii</i> significantly increased duckweed growth</li> <li>PGPB quantities decreased after 7 days</li> </ul> | Ishizawa et al., 2020 [104] |
| Lettuce<br><br>Black Seeded Simpson<br><br>Bibb | <ul style="list-style-type: none"> <li><i>Gluconacetobacter diazotrophicus</i></li> </ul> | 8.2-16.2%                         | Two factor fixed effect randomized<br><br>1 PGPB +control<br><br>6 levels fertilizer<br><br>3-4 replicates repeated twice | 30-31 days | Kratky hydroponic jars<br><br>44 jars/chamber<br><br>Foil wrapped, 800mL       | <ul style="list-style-type: none"> <li><i>Gluconacetobacter diazotrophicus</i> increased lettuce yields</li> <li>IAA, gibberellins</li> </ul>                         | Sebring, 2022 [125]         |

|         |                                                                                                                                                                                         |                                                           |                                                                        |            |                                                                                    |                                                                                                                                                                                                                            |                     |
|---------|-----------------------------------------------------------------------------------------------------------------------------------------------------------------------------------------|-----------------------------------------------------------|------------------------------------------------------------------------|------------|------------------------------------------------------------------------------------|----------------------------------------------------------------------------------------------------------------------------------------------------------------------------------------------------------------------------|---------------------|
| Lettuce | <ul style="list-style-type: none"> <li>• Boost (<i>Bacillus subtilis</i>)</li> </ul>                                                                                                    | Boost increased                                           | Random design                                                          | 28 days    | Recirculating troughs                                                              | <ul style="list-style-type: none"> <li>• <i>Bacillus subtilis</i> increased fresh lettuce weight</li> </ul>                                                                                                                | Utkhede, 2000 [132] |
| Cortina | <ul style="list-style-type: none"> <li>• <i>Enterobacter aerogenes</i></li> <li>• Rootshield (<i>Trichoderma harzianum</i>)</li> <li>• Soilguard (<i>Gliocladium virens</i>)</li> </ul> | fresh lettuce weight by 30% in presence of <i>Pythium</i> | 11 treatments<br>3 replicates<br>3 troughs per treatment               |            |                                                                                    | <ul style="list-style-type: none"> <li>• Mechanism against <i>Pythium</i> was unknown, suspected induction of plant resistance genes, general plant growth promotion, or preventing <i>Pythium</i> colonization</li> </ul> |                     |
| Lettuce | <ul style="list-style-type: none"> <li>• 1.5 g/L of TNC Bactorr containing 12 <i>Bacillus</i> spp. and <i>Paenibacillus polymyxa</i></li> </ul>                                         | Prevented ~15% decrease in yields from salt stress        | 4 treatments or controls<br>4 replicate tanks/group<br>150 plants/tank | 20-22 days | Floating system<br><br>Drilled polystyrene panels<br><br>300 plants/m <sup>2</sup> | <ul style="list-style-type: none"> <li>• Alleviate salt stress (20mM NaCl)</li> <li>• Plants tolerated salinity better in autumn trial compared to spring</li> <li>• Inoculant increased yields</li> </ul>                 | Moncada, 2020 [146] |
| Crispa  |                                                                                                                                                                                         |                                                           |                                                                        |            |                                                                                    |                                                                                                                                                                                                                            |                     |

|                         |                                                                                                                                                                                                                          |                                                                                      |                                                                                                   |         |                                                                                  |                                                                                                                                                                                                                                                                                                                                                                  |                             |
|-------------------------|--------------------------------------------------------------------------------------------------------------------------------------------------------------------------------------------------------------------------|--------------------------------------------------------------------------------------|---------------------------------------------------------------------------------------------------|---------|----------------------------------------------------------------------------------|------------------------------------------------------------------------------------------------------------------------------------------------------------------------------------------------------------------------------------------------------------------------------------------------------------------------------------------------------------------|-----------------------------|
| Lettuce<br>Grand Rapids | <ul style="list-style-type: none"> <li>Tested shifts in native rhizosphere community over time. Main organisms include:</li> <li><i>Pseudomonas</i></li> <li><i>Burkholderia</i></li> <li><i>Sphingomonas</i></li> </ul> | K-struvite had similar yields to traditional NPK fertilizer                          | Randomized complete block design<br><br>6 plants, 3 replicates<br><br>3 urine-derived fertilizers | 29 days | 2L pots with rockwool<br><br>12.5 plants/m <sup>2</sup><br><br>Manual irrigation | <ul style="list-style-type: none"> <li>K-struvite supported rhizosphere communities and had highest nitrogen levels</li> <li>ED concentrate and hydrolyzed urine treatments both had distinct microbial communities and were worse treatments for the crop</li> <li>The most complex microbial community was not always the best one for plant growth</li> </ul> | Van Gerrewey, 2021 [97]     |
| Lettuce<br>Linda        | <ul style="list-style-type: none"> <li><i>Trichoderma viride</i></li> <li><i>Bacillus thuringiensis</i></li> <li><i>Pseudomonas fluorescens</i></li> </ul>                                                               | 70.3% inhibition of bacterial wilt                                                   | 7 treatments + control                                                                            | Unknown | Deepwater culture 30"x18"<br><br>Continuous aeration                             | <ul style="list-style-type: none"> <li>Combining the three PGPB was the most effective combination to reduce bacterial wilt disease caused by <i>Ralstonia solanacearum</i></li> </ul>                                                                                                                                                                           | Khan, 2018 [138]            |
| Lettuce<br>Red Cherokee | 2.41g commercial Sanolife mix<br><ul style="list-style-type: none"> <li><i>Bacillus</i> spp.</li> </ul>                                                                                                                  | 314% increase in growth, however low light and chlorosis were reported in all groups | 6 replicate units<br><br><i>Bacillus</i> + control<br><br>3 replicates per treatment              | 6 weeks | NFT system: 10L<br><br>100L aquaponics tank with tilapia                         | <ul style="list-style-type: none"> <li>Phosphorus solubilization</li> <li><i>Bacillus</i> influenced nitrogen cycle including ammonia, nitrite, and nitrate levels</li> </ul>                                                                                                                                                                                    | Da Silva Cerozi, 2016 [105] |

|                                    |                                                                                                                                                                                                                                                |                                                                    |                                                                                                                 |                                                            |                                                                                     |                                                                                                                                                                                                                                                                                          |                                 |
|------------------------------------|------------------------------------------------------------------------------------------------------------------------------------------------------------------------------------------------------------------------------------------------|--------------------------------------------------------------------|-----------------------------------------------------------------------------------------------------------------|------------------------------------------------------------|-------------------------------------------------------------------------------------|------------------------------------------------------------------------------------------------------------------------------------------------------------------------------------------------------------------------------------------------------------------------------------------|---------------------------------|
| Lettuce<br>Red coral<br>Green oak  | <ul style="list-style-type: none"> <li>• <i>Bacillus velezensis</i></li> </ul>                                                                                                                                                                 | ~46-244% increase in growth in <i>Pythium</i> contaminated lettuce | 8x25 plants per treatment<br><br>3 treatments plus non-treated controls                                         | 40 days                                                    | Dynamic root floating technique<br>1000L<br><br>60 × 94 cm<br><br>24 platforms/unit | <ul style="list-style-type: none"> <li>• <i>Bacillus</i> reduced <i>Pythium</i> root colonization</li> </ul>                                                                                                                                                                             | Kanjanamaneesathian, 2014 [133] |
| Lettuce<br><br>Romaine             | <ul style="list-style-type: none"> <li>• <i>Pseudomonas chlororaphis</i></li> </ul>                                                                                                                                                            | 17% in weight                                                      | 8 treatments<br><br>24 replicates per treatment                                                                 | 10 weeks                                                   | Window farm/ drip system                                                            | <ul style="list-style-type: none"> <li>• Changed levels of cellular and metabolic gene expression in lettuce</li> <li>• Involved in stress reduction and <i>Pythium</i> prevention</li> </ul>                                                                                            | Lee, 2015 [16]                  |
| Lettuce<br><br>Tiberius<br>romaine | <ul style="list-style-type: none"> <li>• <i>Azotobacter chroococcum</i></li> <li>• <i>Azospirillum brasilense</i></li> <li>• <i>Pseudomonas fluorescens</i></li> <li>• <i>Bacillus subtilis</i></li> <li>• <i>Aspergillus niger</i></li> </ul> | ~7-21% increases in total fresh weight                             | Nested design<br><br>50%, 75%, 100% nutrient solution<br>Second factor:4 experimental groups per nutrient level | 28/42 days after planting<br><br>Transplanted at on day 21 | Drip irrigation system<br><br>Average discharge of 3.6 L/h                          | <ul style="list-style-type: none"> <li>• Inoculation reduced the density of indigenous rhizospheric bacteria</li> <li>• Inoculant increased leaf thickness, area, and macronutrient uptake</li> <li>• Bacteria+fungus results in larger yield increases than with group alone</li> </ul> | Aini, 2019 [106,112]            |

|                              |                                                                                     |                                                             |                                                                                                 |               |                                                                                                                         |                                                                                                                                                                                                                                                               |                      |
|------------------------------|-------------------------------------------------------------------------------------|-------------------------------------------------------------|-------------------------------------------------------------------------------------------------|---------------|-------------------------------------------------------------------------------------------------------------------------|---------------------------------------------------------------------------------------------------------------------------------------------------------------------------------------------------------------------------------------------------------------|----------------------|
| Maize                        | <ul style="list-style-type: none"> <li>• <i>Trichoderma virens</i></li> </ul>       | Reduced disease severity                                    | 2 inoculant strains                                                                             | 14 days       | 300mL<br><br>Polycarbonate culture boxes (10.9 by 10.9 by 15.7 cm)<br><br>16 seedlings/unit                             | <ul style="list-style-type: none"> <li>• T. virens provided protection against the pathogen <i>Colletotrichum graminicola</i></li> <li>• The PGPR produces Sm1, which induces plant defense mechanisms</li> <li>• Jasmonic acid genes were induced</li> </ul> | Djonović, 2007 [140] |
| Pepper<br><br>Cubico (sweet) | <ul style="list-style-type: none"> <li>• <i>Pseudomonas chlororaphis</i></li> </ul> | 12-20% increase in fresh shoot mass<br><br>No data on fruit | Predisposed vs non plants<br><br>± <i>Pseudomonas</i><br>± <i>Pythium</i><br><br>3-4 replicates | Up to 19 days | Single plant units<br><br>475mL<br><br>Aerated via bubbler                                                              | <ul style="list-style-type: none"> <li>• <i>Pseudomonas</i> significantly increased growth of peppers with and without <i>Pythium</i></li> <li>• <i>P. chlororaphis</i> delayed root browning</li> </ul>                                                      | Sopher, 2011 [131]   |
| Potato                       | <ul style="list-style-type: none"> <li>• <i>Rhodococcus</i></li> </ul>              | Reduced maceration to 20% of control plants                 | 2 systems, 300 plants                                                                           | 14 weeks      | Two systems<br><br>One 13L batch system holding 100 plants<br><br>Larger system with long gutters held 200 plants (PHS) | <ul style="list-style-type: none"> <li>• Quorum sensing degradation of <i>Pectobacterium</i> resulted in biocontrol</li> <li>• Gamma-caprolactone treatment was used to initiate the biocontrol</li> </ul>                                                    | Cirou, 2011 [139]    |



|                             |                                                                                                                      |                                  |                                                                               |               |                            |                                                                                                                                                                                                                                                                                                                                                                                    |                      |
|-----------------------------|----------------------------------------------------------------------------------------------------------------------|----------------------------------|-------------------------------------------------------------------------------|---------------|----------------------------|------------------------------------------------------------------------------------------------------------------------------------------------------------------------------------------------------------------------------------------------------------------------------------------------------------------------------------------------------------------------------------|----------------------|
| Potato (P)                  | Myco Madness: 0.38 g/L                                                                                               | Measured but not reported;       | Sampled systems every 2 weeks to determine microbial community shifts         | 103 days (DW) | NFT systems                | <ul style="list-style-type: none"> <li>Microbial communities of inoculated plants were more stable over time</li> <li>The Myco Madness product had unexpected composition compared to label</li> <li><i>Pseudoalteromonas</i> sp. were the most effective colonizers from the commercial mix</li> <li>Crop specific trends after receiving the same microbial inoculant</li> </ul> | Sheridan, 2017 [99]  |
| Soybean (S)                 | <ul style="list-style-type: none"> <li>48 taxa isolated</li> <li>7 fungi</li> <li>41 bacteria</li> </ul>             | focus was on community structure |                                                                               | 120 days (BW) |                            |                                                                                                                                                                                                                                                                                                                                                                                    |                      |
| Durum (D) & bread (B) wheat | <ul style="list-style-type: none"> <li>85% was the fungi <i>Mucor</i></li> </ul>                                     |                                  |                                                                               | 114 days (P)  |                            |                                                                                                                                                                                                                                                                                                                                                                                    |                      |
|                             |                                                                                                                      |                                  |                                                                               | 98 days (S)   |                            |                                                                                                                                                                                                                                                                                                                                                                                    |                      |
| Rice                        | From 305 total strains, 30 were tested further. TY0307 (genus and species not provided) was the best growth promoter | ~30%                             | 30 strains screened<br><br>10 plants/flask<br><br>3 replicates                | 10 days       | Flasks containing 150mL    | <ul style="list-style-type: none"> <li>ACC deaminase</li> <li>Salt tolerance</li> <li>TY0307 was the most effective isolate</li> <li>Increase proline and reduced ROS stress</li> </ul>                                                                                                                                                                                            | Zhang, 2018 [120]    |
| Rice                        | <ul style="list-style-type: none"> <li><i>Bacillus amyloliquefaciens</i></li> </ul>                                  | 15.4%                            | 1 inoculant + control<br><br>Regular and 200mM salt []<br><br>6-12 replicates | 10-30 days    | 15mL conical tube floating | <ul style="list-style-type: none"> <li>PGPB upregulated 14 genes, induced salt tolerance</li> <li>During salt stress, the microbial community shifted to organisms that use osmoprotectants such as trehalose</li> </ul>                                                                                                                                                           | Nautiyal, 2013 [147] |

|                 |                                                                                                                                                                 |                       |                              |             |                                                     |                                                                                                                                                                                                                                                                                                                                                                         |                      |
|-----------------|-----------------------------------------------------------------------------------------------------------------------------------------------------------------|-----------------------|------------------------------|-------------|-----------------------------------------------------|-------------------------------------------------------------------------------------------------------------------------------------------------------------------------------------------------------------------------------------------------------------------------------------------------------------------------------------------------------------------------|----------------------|
| Rice            | <ul style="list-style-type: none"> <li>• <i>Pantoea agglomerans</i></li> <li>• <i>Lelliottia amnigena</i></li> <li>• <i>Enterobacter</i> sp.</li> </ul>         | ~20%                  | 8 plants<br>6 replicates     | 9 days      | 1.2L container<br><br>Solution renewed every 3 days | <ul style="list-style-type: none"> <li>• IAA, nitrogen fixation, phosphorus solubilization</li> <li>• <i>Pantoea agglomerans</i> reduced cadmium concentrations and increased yield</li> </ul>                                                                                                                                                                          | Tian, 2022 [113]     |
| Rice<br>KDML105 | <ul style="list-style-type: none"> <li>• <i>Pseudomonas stutzeri</i></li> <li>• <i>Cupriavidus taiwanensis</i></li> <li>• <i>Delftia acidovorans</i></li> </ul> | 50% arsenic reduction | 3 replicates<br>5 inoculants | 90-135 days | 10 × 10 × 15 cm containers containing 300mL         | <ul style="list-style-type: none"> <li>• <i>Cupriavidus taiwanensis</i> and <i>Pseudomonas stutzeri</i> was the optimal combination to reduce arsenic toxicity in rice</li> <li>• Root sulfide accumulation increased to transition arsenic into a harmless arsenic sulfide form</li> <li>• IAA, phosphorus solubilization, nitrogen fixation, ACC deaminase</li> </ul> | Thongnok, 2021 [126] |

|                |                                                                                                                                                                                                                                            |                                                                    |                                             |         |                                                               |                                                                                                                                                                                                                                                                   |                           |
|----------------|--------------------------------------------------------------------------------------------------------------------------------------------------------------------------------------------------------------------------------------------|--------------------------------------------------------------------|---------------------------------------------|---------|---------------------------------------------------------------|-------------------------------------------------------------------------------------------------------------------------------------------------------------------------------------------------------------------------------------------------------------------|---------------------------|
| Sedum alfredii | <ul style="list-style-type: none"> <li><i>Pseudomonas fluorescens</i></li> </ul>                                                                                                                                                           | Increased lateral root formation                                   | 1 inoculant + control<br>4 replicates       | 4 weeks | 1L container                                                  | <ul style="list-style-type: none"> <li><i>Pseudomonas fluorescens</i> promoted cadmium uptake</li> <li>146 plant hormone genes were upregulated</li> <li>IAA, ACC deaminase</li> <li>Decreased multiple compounds including jasmonic and abscisic acid</li> </ul> | Wu, 2020 [128]            |
| Sorghum        | 12 species total tested: <ul style="list-style-type: none"> <li><i>Pseudomonas</i> spp.</li> <li><i>Bacillus</i> spp.</li> <li><i>Burkholderia</i> spp.</li> <li><i>Phyllobacterium</i></li> <li><i>Chitinophaga japonensis</i></li> </ul> | 7-140%                                                             | 12 inoculants + control<br>6 replicates     | 4 weeks | Tyndallized vermiculite<br><br>Watered every other day        | <ul style="list-style-type: none"> <li>IAA, siderophores, phosphorus solubilization</li> <li>IAA producing <i>Pseudomonas</i> strains resulted in the greatest increase in plant yields</li> </ul>                                                                | Amora-Lazcano, 2022 [108] |
| Soybean        | Myco Madness mix <ul style="list-style-type: none"> <li>14 bacteria</li> <li>Yeasts</li> <li>12 fungi</li> </ul>                                                                                                                           | 29.9% increase in plant growth<br><br>36.9% increase in seed yield | 48 per group<br><br>16/double gully x 3 rep | 98 days | NFT system<br><br>Double gully<br><br>Polyprop. 21L reservoir | <ul style="list-style-type: none"> <li>Higher density stomata</li> <li>Thicker palisade parenchyma</li> <li>Better maximal PSII photochemical efficiency</li> </ul>                                                                                               | Paradiso, 2017 [114]      |

|             |                                                                                                                                                                                                   |                                                                              |                                  |               |                                                  |                                                                                                                                                                                                                                                                                                                                                   |                                        |
|-------------|---------------------------------------------------------------------------------------------------------------------------------------------------------------------------------------------------|------------------------------------------------------------------------------|----------------------------------|---------------|--------------------------------------------------|---------------------------------------------------------------------------------------------------------------------------------------------------------------------------------------------------------------------------------------------------------------------------------------------------------------------------------------------------|----------------------------------------|
| Strawberry  | <ul style="list-style-type: none"> <li>• <i>Gluconacetobacter diazotrophicus</i></li> </ul>                                                                                                       | Reduced iron + inoculant was best for plant nutrition and phenolic compounds | 3x3 factorial randomized design  | 60 days       | 100mL glass container covered with aluminum foil | <ul style="list-style-type: none"> <li>• Siderophore production</li> <li>• Hydroxamate siderophores were more beneficial than catechol siderophores</li> </ul>                                                                                                                                                                                    | Delaporte-Quintana, 2020 [118]         |
| Pájaro      | <ul style="list-style-type: none"> <li>• <i>Azospirillum brasilense</i></li> </ul>                                                                                                                |                                                                              | 2 inoculants + control           |               |                                                  |                                                                                                                                                                                                                                                                                                                                                   |                                        |
|             |                                                                                                                                                                                                   |                                                                              | 3 iron levels                    |               |                                                  |                                                                                                                                                                                                                                                                                                                                                   |                                        |
|             |                                                                                                                                                                                                   |                                                                              | 10 replicates                    |               |                                                  |                                                                                                                                                                                                                                                                                                                                                   |                                        |
| Switchgrass | <ul style="list-style-type: none"> <li>• <i>Pseudomonas grimontii</i></li> <li>• <i>Pantoea vagans</i></li> <li>• <i>Pseudomonas veronii</i></li> <li>• <i>Pseudomonas fluorescens</i></li> </ul> | 22-112% fresh shoot increase                                                 | 6 replicate pots                 | Up to 45 days | 1.5 L polypropylene pots                         | <ul style="list-style-type: none"> <li>• PBPB inoculated plants had elevated HSP70 and HMA3 genes under cadmium stress (20 µmol/L)</li> <li>• IAA production, ACC deaminase, phosphorus solubilization</li> <li>• <i>Pseudomonas fluorescens</i> and <i>Pseudomonas veronii</i> resulted in the largest increase in fresh shoot weight</li> </ul> | Begum, 2018 [109]<br>Begum, 2019 [110] |
| Tomato      | <ul style="list-style-type: none"> <li>• <i>Pseudomonas fluorescens</i></li> </ul>                                                                                                                | ~10-26% fruit mass increase                                                  | Randomized complete block design | 6 weeks       | Drip irrigation system                           | <ul style="list-style-type: none"> <li>• IAA, phosphorus solubilization, siderophores, HCN</li> </ul>                                                                                                                                                                                                                                             | Gül, 2012 [111]                        |
| Bandita     | <ul style="list-style-type: none"> <li>• <i>Pseudomonas putida</i></li> </ul>                                                                                                                     |                                                                              |                                  |               | 2L/h flow rate                                   |                                                                                                                                                                                                                                                                                                                                                   |                                        |
| Kardelen    |                                                                                                                                                                                                   |                                                                              | 2 cultivars, 4 PGPR+1 control    |               |                                                  | <ul style="list-style-type: none"> <li>• <i>Pseudomonas</i> strains significantly increased tomato plant and fruit yields</li> </ul>                                                                                                                                                                                                              |                                        |
|             |                                                                                                                                                                                                   |                                                                              | 12 plants/group                  |               |                                                  |                                                                                                                                                                                                                                                                                                                                                   |                                        |

|                                                            |                                                                                                                                                                                                                                                                                                                               |                                         |                                                                                                     |                            |                                                                                                                                            |                                                                                                                                                                                                                                                                                                                                                                                                                                        |                           |
|------------------------------------------------------------|-------------------------------------------------------------------------------------------------------------------------------------------------------------------------------------------------------------------------------------------------------------------------------------------------------------------------------|-----------------------------------------|-----------------------------------------------------------------------------------------------------|----------------------------|--------------------------------------------------------------------------------------------------------------------------------------------|----------------------------------------------------------------------------------------------------------------------------------------------------------------------------------------------------------------------------------------------------------------------------------------------------------------------------------------------------------------------------------------------------------------------------------------|---------------------------|
| Tomato<br><br>Belladonna F1<br>grated onto self<br>and M82 | <ul style="list-style-type: none"> <li>● <i>Paenibacillus</i></li> <li>● <i>Enterobacter mori</i></li> <li>● <i>Lelliottia sp.</i></li> </ul>                                                                                                                                                                                 | No impact on<br>fruit biomass           | Randomized<br>block design<br>with three<br>factors<br><br>4 PGPB<br><br>3 replicates               | 55 days post<br>transplant | Open<br>hydroponic<br>system in pots<br><br>Perlite<br>growing<br>medium                                                                   | <ul style="list-style-type: none"> <li>● <i>Enterobacter mori</i><br/>had the highest<br/>plant vegetative<br/>biomass under<br/>stressed and<br/>control conditions</li> <li>● Trehalose<br/>biosynthesis was<br/>increased by PGPB<br/>application</li> </ul>                                                                                                                                                                        | Kalozoumis, 2021<br>[148] |
| Tomato<br><br>Cherry<br><br>Golden Gem                     | PGPR: <ul style="list-style-type: none"> <li>● <i>Azotobacter chroococcum</i></li> <li>● <i>Azospirillum brasilense</i></li> <li>● <i>Pseudomonas fluorescens</i></li> <li>● <i>Bacillus subtilis</i></li> <li>● <i>Aspergillus niger</i></li> </ul><br>AMF <ul style="list-style-type: none"> <li>● <i>Glomus</i></li> </ul> | PGPR=29%<br><br>AMF=64%<br><br>Both=48% | Completely<br>randomized<br>nested design<br><br>3 nutrient [I]s<br><br>3 inoculants<br>and control | Unknown                    | Drip irrigation<br>3.6L/h<br><br>Transplanted<br>to polybags<br>containing<br>sand, rice<br>straw<br>charcoal, and<br>compost on<br>day 28 | <ul style="list-style-type: none"> <li>● Fungal applications<br/>resulted in the<br/>highest fruit weight<br/>and diameter<br/>compared to<br/>bacteria or fungi +<br/>bacteria</li> <li>● Higher fertilizer<br/>increased sugar<br/>content and<br/>reduced total<br/>titrated acid:<br/>phosphate<br/>availability is<br/>involved in this<br/>process. Inoculants<br/>increased sugar<br/>content and<br/>titrated acid.</li> </ul> | Aini, 2019 [106,112]      |

|                                                                  |                                                                                                                                                                                                                                                                                                                                            |                                                                                          |                                                                                                                 |                                             |                                                           |                                                                                                                                                                                                                                                                   |                       |
|------------------------------------------------------------------|--------------------------------------------------------------------------------------------------------------------------------------------------------------------------------------------------------------------------------------------------------------------------------------------------------------------------------------------|------------------------------------------------------------------------------------------|-----------------------------------------------------------------------------------------------------------------|---------------------------------------------|-----------------------------------------------------------|-------------------------------------------------------------------------------------------------------------------------------------------------------------------------------------------------------------------------------------------------------------------|-----------------------|
| Tomato<br>Ingvar                                                 | <ul style="list-style-type: none"> <li><i>Pseudomonas fluorescens</i></li> </ul> <p>Three commercial mixes:</p> <ul style="list-style-type: none"> <li>Binab T (<i>Trichoderma polysporum</i> and <i>T. harzianum</i>)</li> <li>Gliomix (<i>Gliocladium cantenulatum</i>)</li> <li>Mycostop (<i>Streptomyces griseoviridis</i>)</li> </ul> | <p>&gt;50% decrease in disease incidence</p> <p>~30-50% increase in dry shoot weight</p> | <p>6 treatments: 4 inoculants, pathogen exposure only, no pathogen</p> <p>4 replicates</p>                      | 4 weeks                                     | <p>Static aerated culture system</p> <p>1L containers</p> | <ul style="list-style-type: none"> <li>All tested products were effective against <i>Pythium</i></li> <li>Binab T and Mycostop were effective against <i>Fusarium</i></li> </ul>                                                                                  | Khalil, 2010 [134]    |
| Tomato<br>Saturn<br><br>Ponderosa<br><br>Lettuce<br><br>Saradana | <ul style="list-style-type: none"> <li>Unspecified soil-derived ammonifiers and nitrifiers</li> </ul>                                                                                                                                                                                                                                      | No significant difference                                                                | <p>3 replicates per treatment</p> <p>4 plants per pot</p> <p>Inorganic vs organic vs fish based fertilizers</p> | Various measurements recorded up to 70 days | <p>1L hydroponic pots</p> <p>Aerated with pumps</p>       | <ul style="list-style-type: none"> <li>Soil based microorganisms that were able to convert organic nitrogen to nitrate were cultured</li> <li>Outlined a method to use organic fertilizer in hydroponic instead of inorganic</li> </ul>                           | Shinohara, 2011 [107] |
| Tomato<br>Vision                                                 | <ul style="list-style-type: none"> <li><i>Pseudomonas fluorescens</i> strains</li> </ul>                                                                                                                                                                                                                                                   | <p>5.6-9.6% in spring</p> <p>13.3-18.2% in fall</p>                                      | <p>Randomized complete block</p> <p>3 plants per grow bag</p> <p>5 replicates</p>                               | Fruit collected 1-2x per week               | 24L peat mix growbags                                     | <ul style="list-style-type: none"> <li>Fall crop has significantly larger crop yield increases than the spring</li> <li><i>P. fluorescens</i> strain 63-28 was the most beneficial</li> <li>Unknown mechanism: no effect on shoots at transplant stage</li> </ul> | Gagné, 1993 [127]     |

|       |                                                                                                                                                                                                                                                                                                                                                                                                                                            |                                                                |                                                                  |                          |                                                                                 |                                                                                                                                                                                                                                                                                                                                                                                         |                     |
|-------|--------------------------------------------------------------------------------------------------------------------------------------------------------------------------------------------------------------------------------------------------------------------------------------------------------------------------------------------------------------------------------------------------------------------------------------------|----------------------------------------------------------------|------------------------------------------------------------------|--------------------------|---------------------------------------------------------------------------------|-----------------------------------------------------------------------------------------------------------------------------------------------------------------------------------------------------------------------------------------------------------------------------------------------------------------------------------------------------------------------------------------|---------------------|
| Wheat | Cyanobacteria: <ul style="list-style-type: none"> <li>• <i>Calothrix</i> sp.</li> <li>• <i>Anabaena cylindrica</i></li> </ul> PGPB: <ul style="list-style-type: none"> <li>• <i>Chryseobacterium balustinum</i></li> <li>• <i>Pseudomonas simiae</i></li> <li>• <i>Pseudomonas fluorescens</i></li> </ul>                                                                                                                                  | 36-80%                                                         | 13 treatments<br><br>3 controls<br><br>5 replicates per group    | 17 days                  | Truncated plastic Eppendorf microtube (seedlings)<br><br>Day 2: 50mL test tubes | <ul style="list-style-type: none"> <li>• IAA production</li> <li>• The consortium of five organisms produced the greatest increase in growth</li> </ul>                                                                                                                                                                                                                                 | Kholssi, 2021 [123] |
| Wheat | 18 tested in total including: <ul style="list-style-type: none"> <li>• <i>Bacillus</i> sp.</li> <li>• <i>Halobacillus</i> sp.</li> <li>• <i>Staphylococcus succinus</i></li> <li>• <i>Zhihengliuella halotolerans</i></li> <li>• <i>Oceanobacillus oncorhynchi</i></li> <li>• <i>Exiguobacterium aurantiacum</i></li> <li>• <i>Halomonas</i> sp.</li> <li>• <i>Virgibacillus picturae</i></li> <li>• <i>Thalassobacillus</i> sp</li> </ul> | Reduced growth reduction from salt stress from 58.4% to 15.6%. | Control + 18 strains<br><br>4 salt []s<br><br>Replicated 3 times | Day 10 after germination | Unspecified<br><br>Aerated with pumps                                           | <ul style="list-style-type: none"> <li>• Alleviate salt stress (200mM NaCl)</li> <li>• IAA, ammonia production, nitrogen fixation, phosphorus solubilization, ACC deaminase</li> <li>• The most effective organisms were <i>Thalassobacillus</i> sp., <i>Bacillus</i> sp., <i>Halomonas</i> sp., <i>Oceanobacillus</i> sp., <i>Zhihengliuella</i> sp. and <i>S. succinus</i></li> </ul> | Orhan, 2016 [121]   |

Note: Although the review predominantly focuses on plant growth promoting bacteria, key studies that tested both fungi and bacteria were included to provide a thorough update on the current state of hydroponic research.
